# Supplementary material for: RET fusions observed in lung and colorectal cancers are sensitive to ponatinib
Source: PubMed Central journal article supplement (PMC6049858; doi:10.18632/oncotarget.25664), 2018-07-03
Supplement: oncotarget-09-29654-s001.pdf [file oncotarget-09-29654-s001.pdf]

## RET fusions observed in lung and colorectal cancers are sensitive to ponatinib

### SUPPLEMENTARY MATERIALS

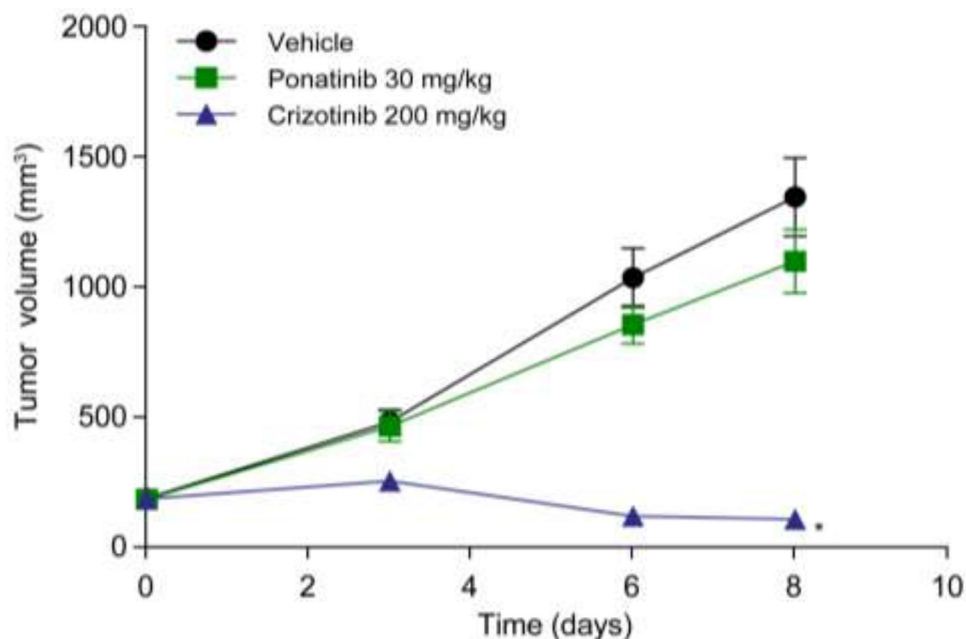

**Supplementary Figure 1: Evaluation of ponatinib's selectivity in an isogenic Ba/F3 tumor model harboring EML4-ALK.** Tumor-bearing animals were treated (by oral gavage) once-daily with vehicle or the indicated dose of either ponatinib or crizotinib for 8 days. The vehicle for ponatinib (citrate buffer) is shown, and nearly identical tumor growth was observed for the vehicle used for crizotinib (water; data not shown). Mean tumor volume and SEM are plotted. Each treatment group was compared with the relevant vehicle group using 1-way ANOVA ( $*P < 0.05$ ).

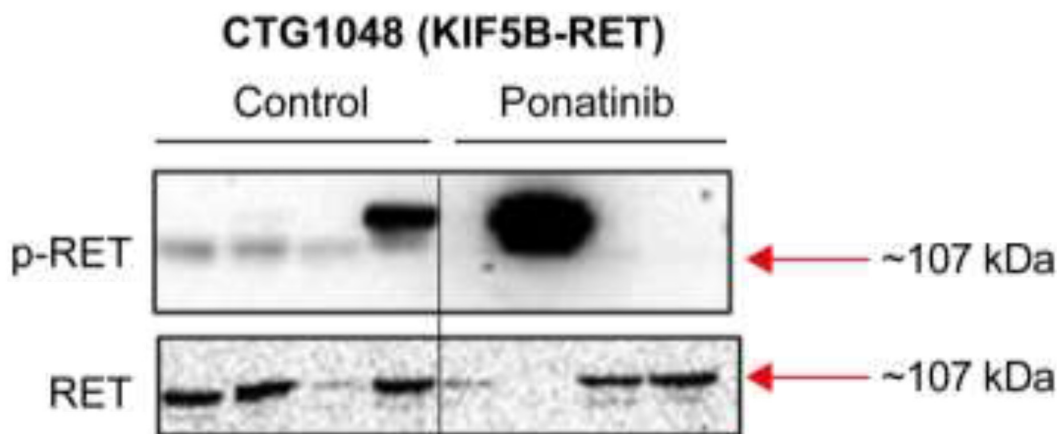

**Supplementary Figure 2: Association of Ponatinib and p-RET Inhibition in KIF5B-RET-positive NSCLC PDX model, CTG-1048.** Pharmacodynamic effect of ponatinib treatment in KIF5B-RET NSCLC PDX model CTG-1048, was assessed. Mice were administered a single oral dose of vehicle or ponatinib (20 mg/kg) and tumors were collected 6 hours later. Each lane represents a separate animal.

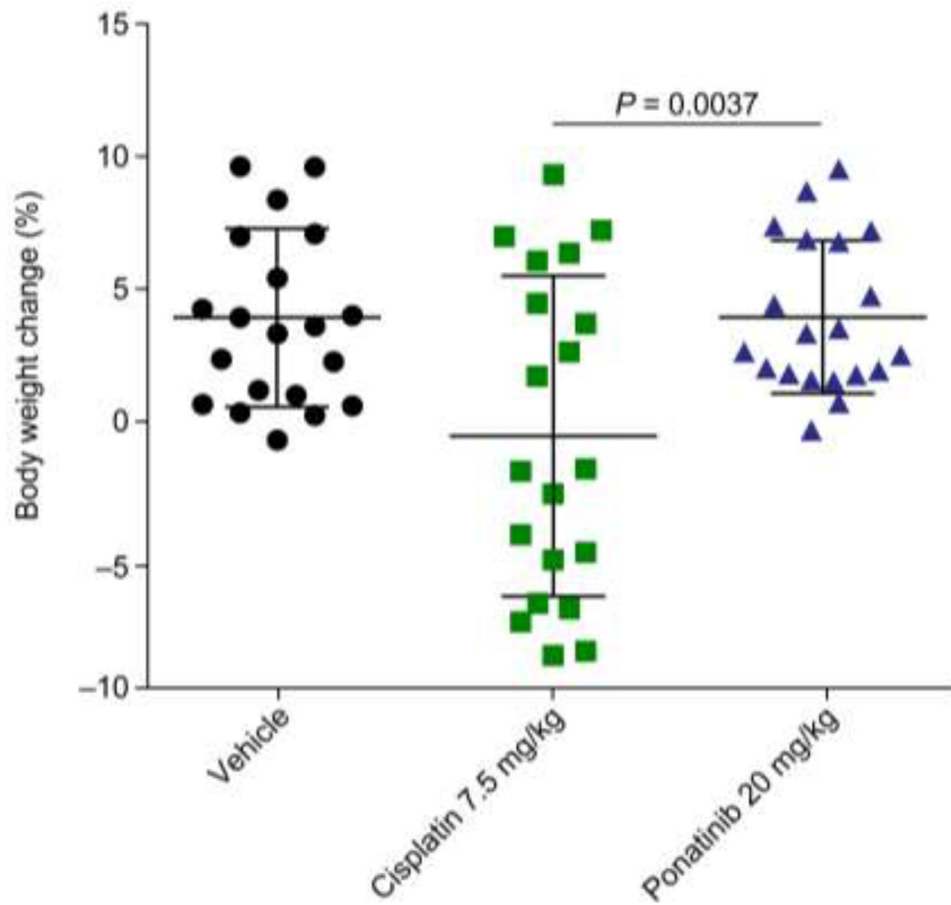

**Supplementary Figure 3: The tolerability of ponatinib versus cisplatin.** Ponatinib (20 mg/kg q.d. orally) and cisplatin (7.5 mg/kg once-weekly i.p.) were administered for 28 days in 3 different mouse models. All body weight percent changes across all days for which paired data existed were compiled (see Materials and Methods).

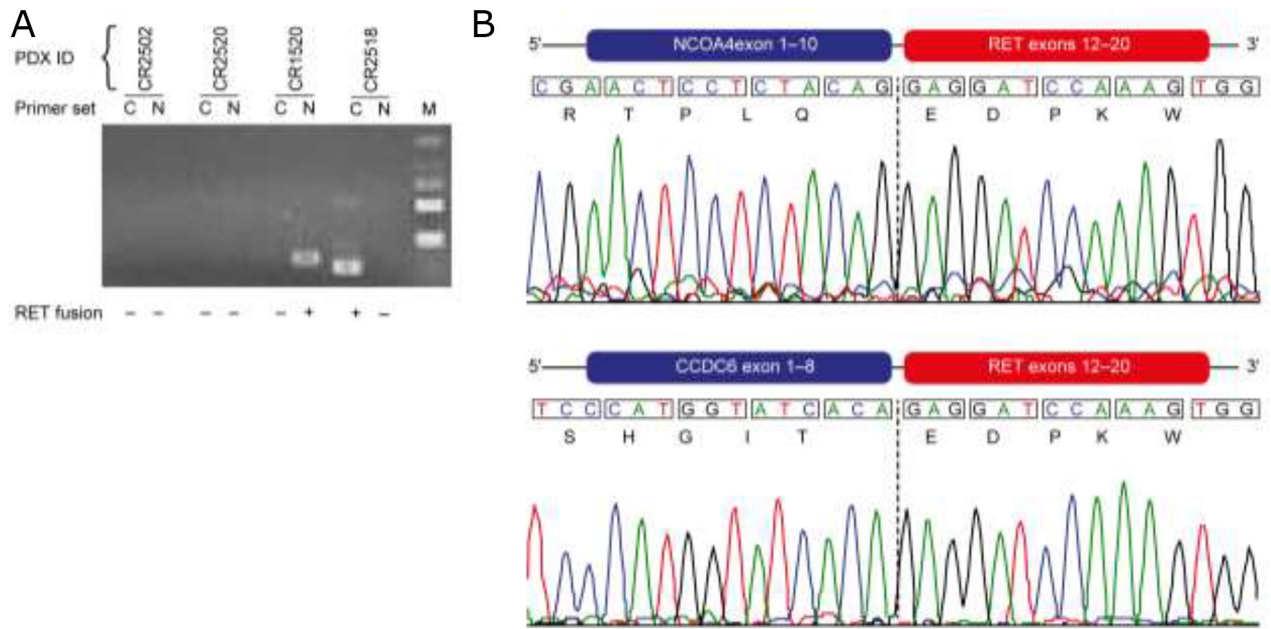

**Supplementary Figure 4: Validation of the 2 CRC fusion gene breakpoint locations.** (A) Detection of RET fusions by RT-PCR of RNA isolated from PDX tumor samples. C, CCDC6-RET primers; N, NCOA4-RET primers; M, Marker. (B) Validation of fusion gene breakpoint using Sanger sequencing of the cDNA.

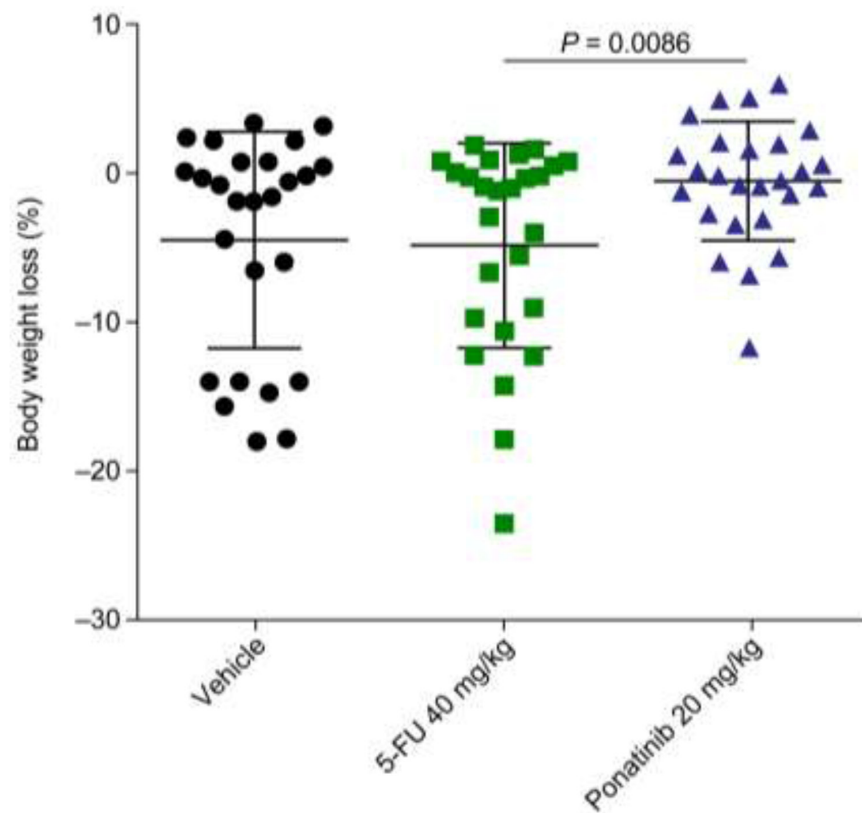

**Supplementary Figure 5: The tolerability of ponatinib versus 5-FU.** Ponatinib (20 mg/kg q.d. orally) and 5-FU (40 mg/kg daily) were administered for 28 days in 4 different mouse models. All body weight percent changes across all days for which paired data existed were compiled.

**Supplementary Table 1: Antitumor activity of ponatinib against NSCLC or CRC PDX tumor models *in vivo***

| Model ID | Cancer type | RET fusion status | Ponatinib                  | 5-FU                | Cisplatin                  |                            |
|----------|-------------|-------------------|----------------------------|---------------------|----------------------------|----------------------------|
|          |             |                   | Tumor growth inhibition, % | Tumor regression, % | Tumor growth inhibition, % | Tumor growth inhibition, % |
| CR2518   | CRC         | CCDC6-RET         | -                          | 78                  | 0                          | -                          |
| CR1520   | CRC         | NCOA4-RET         | 79                         | -                   | 62                         | -                          |
| CR2502   | CRC         | WT                | 41                         | -                   | 68                         | -                          |
| CR2520   | CRC         | WT                | 24                         | -                   | 72                         | -                          |
| CTG0838  | NSCLC       | KIF5B-RET         | 80                         | -                   | -                          | 26                         |
| CTG1048  | NSCLC       | KIF5B-RET         | -                          | 11                  | -                          | 95                         |
| CTG0170  | NSCLC       | WT                | 51                         | -                   | -                          | 58                         |

5-FU, 5-fluorouracil; CRC, colorectal cancer; NSCLC, non-small cell lung cancer; PDX, patient-derived xenograft; WT, wild type.
